1

2

3

4 Coffee polyphenols prevent cognitive dysfunction and suppress amyloid  $\beta$  plaques in  
5 APP/PS2 transgenic mouse

6

7

8 Keiko Ishida<sup>1\*</sup>, Masaki Yamamoto<sup>1</sup>, Koichi Misawa<sup>1</sup>, Noriyasu Ota<sup>1</sup>, Akira  
9 Shimotoyodome<sup>2</sup>

10

11

12 <sup>1</sup>Biological Science Laboratories, Kao Corporation, Haga-gun, Tochigi, Japan

13 <sup>2</sup>Health Care Food Research Laboratories, Kao Corporation, Sumida, Tokyo, Japan

14

15

16 \*Corresponding author: Keiko Ishida, Ph.D.

17 E-mail address: [ishida.keiko2@kao.co.jp](mailto:ishida.keiko2@kao.co.jp) (KI)

18

19

20

## 21 **Abstract**

22           Epidemiological studies have found that habitual coffee consumption may  
23 reduce the risk of Alzheimer's disease. Coffee contains numerous phenolic compounds  
24 (coffee polyphenols) such as chlorogenic acids. However, evidence demonstrating the  
25 contribution of chlorogenic acids in preventing cognitive dysfunction induced by  
26 Alzheimer's disease is limited. In this study, we investigated the effect of chlorogenic  
27 acids on prevention of cognitive dysfunction in APP/PS2 transgenic mouse model of  
28 Alzheimer's disease. Five-week-old APP/PS2 mice were administered a diet  
29 supplemented with coffee polyphenols daily for 5 months. The memory and cognitive  
30 function of mice was determined using the novel object recognition test, the Morris  
31 water maze test, and the step-through passive avoidance test. We found that chronic  
32 treatment with coffee polyphenols prevented cognitive dysfunction and significantly  
33 reduced hippocampal A $\beta$  deposition. We then determined the effect of 5-caffeoylquinic  
34 acid, one of the primary components of coffee polyphenols, on A $\beta$  formation.  
35 5-Caffeoylquinic acid did not inhibit A $\beta$  fibrillation, but degraded A $\beta$  fibrils in a  
36 dose-dependent manner. In conclusion, these results demonstrate that coffee  
37 polyphenols prevented cognitive deficits and alleviated A $\beta$  plaque deposition via  
38 disaggregation of A $\beta$  in APP/PS2 mouse.

39

40

41

## 42 **Introduction**

43 Alzheimer's disease (AD), a neurodegenerative disease characterized by  
44 memory and cognitive dysfunction, is a worldwide public health problem. Its  
45 pathological features include the accumulation of amyloid  $\beta$  ( $A\beta$ ) peptides (amyloid  
46 plaque) and aggregation of neurofibrillary tangles, which play causal and central roles  
47 in AD progression [1, 2].  $A\beta$  accumulation is due to an imbalance between its synthesis  
48 and clearance.  $A\beta$  is generated through proteolytic processing that involves two types of  
49 proteases, namely,  $\beta$ - and  $\gamma$ -secretase [3]. A transmembrane aspartic protease called  
50  $\beta$ -site APP cleaving enzyme (BACE1) is responsible for  $\beta$ -secretase activity. Although  
51 BACE1 cleaves APP and releases the soluble domain out of the cell,  $A\beta$  body remains  
52 attached to the C-terminal fragment (C99) bound to the cell membrane [4]. Furthermore,  
53 C99 undergoes cleavage by  $\gamma$ -secretase and releases  $A\beta$  isoforms such as  $A\beta$  1–40 and  
54  $A\beta$  1–42 [5]. Conversely in the nonamyloidogenic pathway,  $\alpha$ -secretase cleaves  
55 amyloid- $\beta$  precursor protein (APP) within the  $A\beta$  domain and produces soluble APP- $\alpha$ ,  
56 thus preventing  $A\beta$ . To date, no curative treatment for AD has been reported; most  
57 therapeutic approaches transiently relieve symptoms and do not improve or inhibit  
58 disease progression. The dominantly inherited Alzheimer's network study, which  
59 observes changes in the brain from pre-AD onset, revealed that AD develops as the  
60 brain changes over time [6]. Hence, treatment is speculated to be slow since symptoms  
61 have already emerged [7], and biomarker exploratory studies to start treatment early [8]  
62 and prevention studies have attracted attention.

63 Coffee is a popular beverage worldwide and has been consumed for many years  
64 because of its attractive flavor and physiological effects. It is also one of the best  
65 documented food items with epidemiological effects [9]. Epidemiological studies found  
66 that coffee consumption habits may reduce the risk of mild cognitive impairment and

67 AD [10,11]. Coffee contains numerous phenolic compounds [coffee polyphenols (CPP)],  
68 such as chlorogenic acids (CGAs), and a single cup of coffee contains 70–350 mg of  
69 CGAs [12]. CGAs promote neuronal differentiation [13] and protect against A $\beta$ -induced  
70 cell death by disaggregation of A $\beta$  protein [14,15]. In addition, CGAs possess  
71 antioxidant activity, thereby improving temporary amnesia in mice [16]. These findings  
72 led us to hypothesize that CGAs could prevent memory and cognitive dysfunction  
73 induced by A $\beta$ . However, whether CGAs have beneficial effects on AD is unknown.

74 APP/PS2 mice are double transgenic mice, overexpressing mutant forms of  
75 human A $\beta$  precursor protein (hAPP) and human presenilin-2 (hPS2) [17,18]. Richards et  
76 al. reported that APP/PS2 mice exhibit AD-like impairments, such as amyloidosis,  
77 inflammation, impaired synaptic plasticity, and cognitive dysfunction [17].

78 In the present study, we used APP/PS2 mice as the model of AD to investigate  
79 whether memory and cognitive function could be maintained by treatment with CPP.  
80 These mice are a suitable model to investigate the therapy and prevention of AD  
81 because A $\beta$  deposition was observed at 2–3 months of age in APP/PS2 mice. Thereafter,  
82 the cognitive decline was expressed at 4–5 months of age [18]. These behavioral and  
83 pathological changes in APP/PS2 mice are due to age-related cognitive dysfunction  
84 associated with amyloidosis.

85

86

## 87 **Materials and methods**

### 88 **Preparation of CPP**

89 Green coffee beans were extracted with hot water and spray dried. The extract  
90 was mixed with 52.4% ethanol solution, acid clay (MIZUKA ACE #600; Mizusawa

91 Industrial Chemicals, Tokyo, Japan), and filter aid (SOLCA FLOC; JX Nippon Product  
92 Corporation, Tokyo, Japan) to obtain CPP obtaining slurry. The slurry was mixed with  
93 52.4% ethanol solution and filtered with a diatomaceous earth filter. The filtrate was  
94 applied to activated charcoal column (SHIRASAGI WH2C; Osaka Gas Chemicals,  
95 Osaka, Japan) and cation-exchange resin column (SK1BH; Mitsubishi Chemical, Tokyo,  
96 Japan). The column processing solution was filtered using a 0.2-mm pore size  
97 membrane, and ethanol was removed with a rotary evaporator. The CPP-rich fraction  
98 was diluted with distilled water to yield a 3% (w/v) solution and centrifuged at 15 °C  
99 (1000×g, 60 min). Thereafter, the precipitate was lyophilized to analyze CPP  
100 composition through high-performance liquid chromatography. The total polyphenol  
101 content of the CPP was 48.3%. The composition of polyphenols was 7.0% 3-CQA,  
102 7.5% 4-CQA, 17.8% 5-CQA, 1.3% 3-FQA, 1.5% 4-FQA, 3.9% 5-FQA, 3.4%  
103 3,4-diCQA, 2.4% 3,5-diCQA, and 3.5% 4,5-diCQA. The CPP preparation contained no  
104 caffeine. The chemical structures of 5-CQA, 5-FQA, and 3,5-diCQA are shown in Fig 1.

105 **Fig 1. Structures of quinic acid derivatives.**

106

## 107 **Animal and diets**

108 The procedure of producing APP/PS2 double transgenic mice and wild-type  
109 (WT) littermates was determined using a method described by Toda et al. [18]. APP<sup>sw</sup>  
110 mice expressing hAPP gene mutant were purchased from Taconic Biosciences (Hudson,  
111 NY, USA). PS2M1 mice expressing hPS2 gene mutant were obtained from Oriental  
112 Yeast Co., Ltd. (Tokyo, Japan). APP/PS2 double transgenic mice were maintained by  
113 cross-breeding with APP<sup>sw</sup> male mice and PS2M1 female mice using in vitro  
114 fertilization and embryo transfer techniques. The mice genotype was confirmed through  
115 polymerase chain reaction analysis of tail-tip DNA.

116 Five-week-old male APP/PS2 mice and WT littermates were individually housed  
117 in a temperature- and humidity-controlled room ( $23 \pm 3$  °C,  $55 \pm 15\%$  relative humidity)  
118 with a 12-h light/12-h dark cycle (lights on at 0600 h). The mice were divided into three  
119 groups (N = 12–15 mice/group). They were provided ad libitum access to water and  
120 either control or CPP diet. The control diet consisted of 10% (wt/wt) fat (corn oil), 20%  
121 casein, 61.5% potato starch, 4% cellulose, 3.5% vitamins, and 1% minerals. The CPP  
122 diet comprised the control diet supplemented with 1% CPP. Animals were maintained  
123 on these diets for 20 weeks. Individual body weights were recorded weekly, and food  
124 intake was measured every 3–4 days. Behavioral analysis was measured after 18 weeks  
125 as described below. After 20 weeks, the mice were anesthetized through isoflurane  
126 (Forane®; Abbott, Tokyo, Japan) inhalation. The brain was then transcardially perfused  
127 with 20 ml of saline, followed by 20 ml of 4% paraformaldehyde (PFA; Wako Pure  
128 Chemical, Osaka, Japan). The perfusate was maintained at 4 °C. After perfusion, the  
129 brain was dissected out, weighed, and stored in 4% PFA at 4 °C until analysis. All  
130 animal experiments were conducted in the Experimental Animal Facility of the Kao  
131 Tochigi Institute, and protocols were approved by the Kao Corporation Animal Care  
132 Committee (Protocol Number: F15045-0000). All surgery was performed under  
133 isoflurane anesthesia, and all efforts were made to minimize suffering.

134

## 135 **Behavioral analysis**

136 Behavioral analysis was performed after 18 weeks in the following order: novel  
137 object recognition test, Morris water maze test, and step-through passive avoidance test.

138

## 139 **Novel object recognition test**

140 The novel object recognition test was performed in a plastic box ( $22 \times 32 \times 13$

141 cm<sup>3</sup>). In the habituation trial on the first day, the mice were allowed to explore the  
142 empty test box for 10 min. On the following day, two objects (block) were placed in the  
143 test box. During the training trial, each mouse was placed in the test box and allowed to  
144 explore the objects for 10 min. Mice were returned to their home cage. After a 2-h  
145 training trial, one of the two objects (familiar) was replaced by a new one (novel), and  
146 test trial was carried out for 5 min. All sessions were video recorded. The exploration  
147 time spent by a mouse touching the object with its nose was measured. Data suggested  
148 that the exploration time spent by a mouse touching with the familiar or novel object is  
149 relative to the total exploration time during the test trial {[familiar or novel / (familiar +  
150 novel)] × 100}. The discrimination index was calculated as follows: {(novel – familiar)  
151 / (familiar + novel)}.

152

### 153 **Morris water maze test**

154 The Morris water maze pool, which had a diameter of 148 cm, contained water  
155 (17–18 °C) with a platform (10 cm diameter) that was submerged 2 cm beneath the  
156 water surface. Mice were first trained (4 days, 3 sessions/day) to find a hidden platform.  
157 The platform location remained invariable, and the entry point changed every trial. A  
158 trial was ended when mice stayed on the platform for 30 s or after 90 s. One day after  
159 day 4 of the training trial, the platform was removed and probe trial was carried out for  
160 90 s. The entry point for the probe task was the reverse of the quadrant of the platform.  
161 The time taken for a mouse to swim to the previous quadrant of the platform was  
162 recorded. Performance was recorded and analyzed with the EthoVision XT (Version 7.0;  
163 Noldus Information Technology, Wageningen, Netherlands).

164

### 165 **Step-through passive avoidance test**

166           The step-through passive avoidance test chamber consisted of a light chamber  
167   ( $10 \times 10 \times 30 \text{ cm}^3$ ) and a dark chamber ( $24 \times 24.5 \times 30 \text{ cm}^3$ ), separated by a guillotine  
168   door (light and dark chamber; Nihon Bioresearch, Gifu, Japan). During the acquisition  
169   trial, each mouse was placed in the light chamber and allowed to search freely. After 10  
170   s, the guillotine door was opened, allowing the mouse access to the dark chamber. The  
171   door closed after the mouse entered the dark chamber, and a 0.2-mA foot shock was  
172   administered to the mouse for 3 s (Shock scrambler; UNICOM, Tokyo, Japan). The  
173   latency time until the mouse entered the dark chamber was measured. Twenty-four  
174   hours after the acquisition trial, the mouse was placed in the light chamber for the test  
175   trial. The time taken for a mouse to enter the dark chamber was recorded.

176

## 177   **Immunohistochemistry**

178           To detect A $\beta$  plaques, brain samples were fixed in 4% PFA, embedded in  
179   paraffin, and 4- $\mu\text{m}$ -thick sections were obtained. Tissue sections were deparaffinized,  
180   treated with 90% formic acid for 5 min, and then incubated with 0.1% hydrogen  
181   peroxide in methanol to prevent endogenous peroxidation for 30 min. Subsequently, the  
182   tissue sections were incubated with the monoclonal antibody anti-human A $\beta$  (#10323;  
183   Immuno-Biological Laboratories, Gunma, Japan, 1:200) at 25 °C for 1 h. The tissue  
184   sections were then incubated with HRP-conjugated streptavidin (Nichirei Biosciences,  
185   Tokyo, Japan) for 5 min, and diaminobenzidine substrate (DAKO, Tokyo, Japan) was  
186   used for color development. The images were acquired with a fluorescence microscope  
187   (BZ-X710; KEYENCE, Osaka, Japan), and quantitative image analysis was determined  
188   using BZ-II application (KEYENCE). Four slices for each mouse were used to quantify  
189   the mean average value of the selected regions. The A $\beta$  deposition in the cerebral cortex  
190   and dorsal hippocampus was analyzed by the percentage of brain regions covered by A $\beta$



191 immunoreactivity.

192

## 193 **RNA extraction and quantitative PCR (qPCR)**

194 Total RNA was extracted using RNeasy Plus Universal Mini kit (Qiagen, Hiden,  
195 Germany). For real-time qPCR, cDNAs were synthesized with the High Capacity  
196 RNA-to-cDNA Kit (Applied Biosystems, Life Technologies, Forster City, CA, USA).  
197 qPCR assays were performed using an Applied Biosystems ViiA7 Real-time PCR  
198 system (Applied Biosystems). Commercially available polymerase chain reaction  
199 primers and FAM-labeled TaqMan probes (TaqMan Gene Expression assays; Applied  
200 Biosystems) were used for the assays. Expression of each gene was normalized against  
201 that of the gene encoding GAPDH, a housekeeping gene. The genes assessed in this  
202 study are listed in Supplemental S1 Table.

203

## 204 **A $\beta$ fibrillization assays**

205 A $\beta$  fibrillization was measured with a commercially available thioflavin T (ThT)  
206 A $\beta$  aggregation kit (Ana Spec, San Jose, CA, USA). The A $\beta$  fibrillization assays were  
207 performed as described in the manufacturer's procedure booklet. A $\beta$ <sub>1-42</sub> peptides were  
208 dissolved in dimethyl sulfoxide (DMSO) to prepare A $\beta$ <sub>1-42</sub> (2.5 mM) stock.  
209 5-Caffeoylquinic acid (5-CQA) was dissolved in DMSO. A $\beta$ <sub>1-42</sub> solution (Ana Spec)  
210 was diluted to a final concentration of 50  $\mu$ M. A $\beta$  solution with ThT solution (200  $\mu$ M;  
211 Ana Spec) and 5-CQA solution (100  $\mu$ M; Cayman Chemical, Ann Arbor, MI, USA) was  
212 incubated at 37 °C in a black 96-well plate. The ThT fluorescence intensity was  
213 measured every 5 min for 90 min using the EnSight plate reader (Perkin Elmer,  
214 Waltham, MA, USA) at 440 nm (ex) and 484 (em).

215

## 216 **A $\beta$ disaggregation assays**

217 A $\beta_{1-42}$  peptides (Peptide Institute, Osaka, Japan) were dissolved in DMSO to  
218 prepare A $\beta_{1-42}$  (5 mM) stock. Subsequently, the A $\beta_{1-42}$  stock was diluted with 50 mM  
219 Tris buffer to make A $\beta_{1-42}$  (250  $\mu$ M) solution. The A $\beta_{1-42}$  solution was aggregated by  
220 incubation at 37 °C for 7–10 days. The aggregation and/or oligomerization state of  
221 A $\beta_{1-42}$  solution was added with either DMSO or 5-CQA solution (1, 10, 100  $\mu$ M,  
222 respectively) and incubated at 37 °C for 7 days. The final concentration of A $\beta_{1-42}$  was  
223 25  $\mu$ M. The fibril formation of A $\beta$  was measured using the ThT assay. Each incubated  
224 A $\beta$  fibril formation was mixed with ThT solution (5  $\mu$ M; Sigma Chemical Co, St. Louis,  
225 MO, USA). Fluorescence of A $\beta$  bind to ThT was measured on the EnSight plate reader  
226 (Perkin Elmer) at 440 nm (ex) and 484 (em).

227

## 228 **Statistical analysis**

229 Variables are expressed as the mean  $\pm$  SEM. Statistical analysis was conducted  
230 using one-way analysis of variance (ANOVA), followed by Bonferroni's post-hoc test  
231 or T-test (GraphPad Prism 6; GraphPad Software, La Jolla, CA, USA). Two-way  
232 repeated ANOVA, followed by Bonferroni's post-hoc test, was used to assess changes  
233 over time and between groups (GraphPad Prism 6). Differences were considered  
234 significant when  $P < 0.05$ .

235

236

237

## 238 **Results**

### 239 **Chronic treatment of CPP does not alter body and brain** 240 **weight in APP/PS2 mice**

241 During the CPP treatment, the general health conditions of APP/PS2 mice did  
242 not significantly change. The body weights of the WT, APP/PS2, and APP/PS2 + CPP  
243 groups were  $46.18 \pm 0.56$ ,  $48.03 \pm 0.95$ , and  $46.60 \pm 0.00$  g (N = 5 mice/group),  
244 respectively. The brain wet weights in the WT, APP/PS2, and APP/PS2 + CPP groups  
245 were  $0.487 \pm 0.003$ ,  $0.4989 \pm 0.009$ , and  $0.4986 \pm 0.006$  g (N = 5 mice/group),  
246 respectively. Both body and brain weights were not significantly different among the  
247 groups.

248

### 249 **Effect of CPP on the novel object recognition test**

250 The effect of CPP on recognition memory was investigated using the novel  
251 object recognition test. In the training trial, each exploration time of the two objects was  
252 similar among three groups (data not shown).

253 The test trial was carried out after a 2-h training trial. In the WT and APP/PS2 +  
254 CPP groups, the percentage of novel object exploration time was increased ( $P < 0.001$ ,  
255 Bonferroni's post-hoc test) compared with the familiar object. However, the exploration  
256 time between familiar and novel objects did not significantly differ in the APP/PS2  
257 group (Fig 2A).

258 When the exploration time of the objects was analyzed as a function of the  
259 discrimination index, the APP/PS2 group decreased ( $P < 0.001$ , Bonferroni's post-hoc  
260 test) compared with the WT group (Fig 2B). By contrast, the discrimination index was  
261 increased in APP/PS2 mice treated with CPP ( $P < 0.001$ , Bonferroni's post-hoc test),

262 indicating that the recognition memory of CPP-treated APP/PS2 mice was improved  
263 (Fig 2B). The total exploration time during the test trial did not differ among the three  
264 groups (Fig 2C).

265

266 **Fig 2. Effect of CPP on object recognition memory in the novel object recognition**

267 **(NOR) test.** (A) Percentage of exploration time for each object, (B) discrimination

268 index, and (C) total object exploration time in the test session. The mice were fed

269 experimental diets for 18 weeks prior to measurements. Values are the mean  $\pm$  SEM of

270 N = 12–15 mice/treatment. (A) \*\*\*:  $P < 0.001$ , familiar object vs. novel object

271 (Bonferroni's post-hoc test). (B), (C) \*\*\*:  $P < 0.001$ , vs. APP/PS2 (Bonferroni's

272 post-hoc test).

273

274 **Effect of CPP on the Morris water maze test**

275 The effect of CPP on spatial learning and memory was investigated using the

276 Morris water maze test. In the training trial, the escape latency time was significantly

277 shorter ( $P < 0.05$ , Bonferroni's post-hoc test) in the WT group than in the APP/PS2

278 group (Fig 3A). The escape latency time did not significantly differ between the WT

279 and APP/PS2+CPP groups (Fig 3A). The swimming speed was the same among the

280 three groups (Fig 3B).

281 Following the 4-day training trial, probe trials were demonstrated on the fifth

282 day. The time swimming in the platform quadrant decreased ( $P < 0.01$ , Bonferroni's

283 post-hoc test) in the APP/PS2 group compared with the WT group (Fig 3C), whereas

284 improved in the APP/PS2+CPP group compared with the APP/PS2 group (Fig 3C). This

285 improvement was comparable with the WT group.

286

287 **Fig 3. Effect of CPP on spatial learning and memory in the Morris water maze test.**

288 (A) Escape latency and (B) swimming speed during training task. (C) Time required  
289 swimming the target quadrant in the probe test. The mice were fed experimental diets  
290 for 19 weeks prior to measurements. Values are the mean  $\pm$  SEM of N = 12–15  
291 mice/treatment. \*: P < 0.05, \*\*: P < 0.01, \*\*\*: P < 0.001, vs. APP/PS2 (Bonferroni's  
292 post-hoc test).

293

294 **Effect of CPP on the step-through passive avoidance test**

295 The effect of CPP on long-term memory was investigated using the step-through  
296 passive avoidance test. In the acquisition trial, the latency time was similar in all groups  
297 (Fig 3). In the test trial after the 24-hour acquisition trial, the latency time was  
298 significantly longer (P < 0.05, Bonferroni's post-hoc test) in the WT group than in the  
299 APP/PS2 group (Fig 4). The latency time tended (P = 0.10, Bonferroni's post-hoc test)  
300 to be improved in the APP/PS2 + CPP group than in the APP/PS2 group (Fig 4).

301

302 **Fig 4. Effect of CPP on the step-through passive avoidance test.** Mice were fed  
303 experimental diets for 21 weeks prior to measurements. Values are the mean  $\pm$  SEM of  
304 N = 12–15 mice/treatment. \*: P < 0.05, vs. APP/PS2 (Bonferroni's post-hoc test).

305

306 **Effect of CPP on A $\beta$  deposition in the brain**

307 A $\beta$  plaque increased in the cortex and hippocampus of the APP/PS2 group  
308 compared with the WT group (Fig 5A), whereas it decreased in those of the APP/PS2 +  
309 CPP group compared with the APP/PS2 group (Fig 5A). The area of A $\beta$  plaque in the  
310 hippocampus was significantly decreased (P < 0.05, T-test) in the APP/PS2 + CPP group  
311 compared with that in the APP/PS2 group (Fig 5B).

312

313 **Fig 5. Effect of CPP on A $\beta$  pathology in the brains of APP/PS2 mice.** (A)

314 Immunohistochemistry of A $\beta$  plaques in the brain slices of WT, APP/PS2, and

315 APP/PS2+CPP mice. The black bar is equal to 200  $\mu$ m for 40 $\times$  magnification. (B)

316 Quantification of A $\beta$  plaques is expressed with bar graphs of mean percentage of area.

317 Values are the mean  $\pm$  SEM of N = 6–8 mice/treatment. \*: P < 0.05, vs. APP/PS2

318 (student t-test).

319

### 320 **Effect of CPP on gene expression in the mouse brain**

321 APP/PS2 mice showed significantly higher mRNA expression of CatB, NOX2, and

322 p22phox than wild type mice in both the hippocampus and cortex (Table 1). Expression

323 of proinflammatory genes, such as CD68, F4/80, IL-1 $\beta$ , and IL-6, was also significantly

324 increased in APP/PS2 mice than in control mice in either the hippocampus and cortex.

325 APP/PS2 mice exhibited significantly higher gene expression of glial cell markers, such

326 as A1, Iba1, and GFAP, than the control mice in either the cortex or hippocampus.

327 CPP-fed APP/PS2 mice had slightly lower mRNA expression of mouse APP in the

328 cortex, but not in the hippocampus, than CPP-non-fed APP/PS2 mice (Table 1). The

329 expression of other genes tested did not differ between CPP-fed APP/PS2 and control

330 mice (Table 1).

331

332 Table 1. Effects of CPP on mRNA expression in the mouse brain  
333

| 334 |                      |             | WT             | APP/PS2     | APP/PS2+CPP   |
|-----|----------------------|-------------|----------------|-------------|---------------|
| 335 | Amyloid metabolism   |             |                |             |               |
| 336 | ADAM10               | Hippocampus | 1.01 ± 0.03    | 1.00 ± 0.01 | 0.97 ± 0.06   |
| 337 |                      | Cortex      | 1.07 ± 0.02*   | 1.00 ± 0.02 | 1.00 ± 0.02   |
| 338 |                      |             |                |             |               |
| 339 | APP (human)          | Hippocampus | N.T.           | 1.00 ± 0.02 | 1.01 ± 0.06   |
| 340 |                      | Cortex      | N.T.           | 1.00 ± 0.02 | 0.96 ± 0.03   |
| 341 |                      |             |                |             |               |
| 342 | APP (mouse)          | Hippocampus | 1.01 ± 0.02    | 1.00 ± 0.02 | 0.87 ± 0.05** |
| 343 |                      | Cortex      | 1.10 ± 0.01*** | 1.00 ± 0.02 | 0.95 ± 0.02   |
| 344 |                      |             |                |             |               |
| 345 | BACE1                | Hippocampus | 0.96 ± 0.02    | 1.00 ± 0.02 | 0.94 ± 0.05   |
| 346 |                      | Cortex      | 1.16 ± 0.02**  | 1.00 ± 0.02 | 1.10 ± 0.05   |
| 347 |                      |             |                |             |               |
| 348 | CatB                 | Hippocampus | 0.74 ± 0.01*** | 1.00 ± 0.03 | 0.97 ± 0.06   |
| 349 |                      | Cortex      | 0.77 ± 0.04*** | 1.00 ± 0.02 | 1.02 ± 0.03   |
| 350 |                      |             |                |             |               |
| 351 | Inflammation         |             |                |             |               |
| 352 | CD68                 | Hippocampus | 0.71 ± 0.03**  | 1.00 ± 0.04 | 0.96 ± 0.09   |
| 353 |                      | Cortex      | 0.60 ± 0.03**  | 1.00 ± 0.07 | 0.89 ± 0.13   |
| 354 |                      |             |                |             |               |
| 355 | F4/80                | Hippocampus | 0.49 ± 0.05*** | 1.00 ± 0.03 | 0.97 ± 0.11   |
| 356 |                      | Cortex      | 0.46 ± 0.03*** | 1.00 ± 0.05 | 0.84 ± 0.10   |
| 357 |                      |             |                |             |               |
| 358 | IL-1β                | Hippocampus | 0.26 ± 0.03**  | 1.00 ± 0.10 | 1.07 ± 0.20   |
| 359 |                      | Cortex      | 0.37 ± 0.06**  | 1.00 ± 0.08 | 1.10 ± 0.19   |
| 360 |                      |             |                |             |               |
| 361 | IL-6                 | Hippocampus | 0.42 ± 0.06*** | 1.00 ± 0.11 | 1.10 ± 0.07   |
| 362 |                      | Cortex      | 0.44 ± 0.06**  | 1.00 ± 0.11 | 1.28 ± 0.13   |
| 363 |                      |             |                |             |               |
| 364 | iNOS                 | Hippocampus | 1.01 ± 0.09    | 1.00 ± 0.03 | 1.09 ± 0.13   |
| 365 |                      | Cortex      | 0.93 ± 0.05    | 1.00 ± 0.05 | 1.04 ± 0.17   |
| 366 |                      |             |                |             |               |
| 367 | Redox regulation     |             |                |             |               |
| 368 | NOX2                 | Hippocampus | 0.40 ± 0.09*** | 1.00 ± 0.06 | 1.15 ± 0.11   |
| 369 |                      | Cortex      | 0.27 ± 0.03*** | 1.00 ± 0.10 | 1.04 ± 0.14   |
| 370 |                      |             |                |             |               |
| 371 | p22phox              | Hippocampus | 0.49 ± 0.04*** | 1.00 ± 0.04 | 1.10 ± 0.12   |
| 372 |                      | Cortex      | 0.32 ± 0.01*** | 1.00 ± 0.03 | 1.09 ± 0.07   |
| 373 |                      |             |                |             |               |
| 374 | Neuroendocrine cells |             |                |             |               |
| 375 | Synaptophysin        | Hippocampus | 0.99 ± 0.02    | 1.00 ± 0.01 | 0.93 ± 0.05   |
| 376 |                      | Cortex      | 1.09 ± 0.02    | 1.00 ± 0.02 | 1.06 ± 0.06   |
| 377 |                      |             |                |             |               |
| 378 | Glial cells          |             |                |             |               |
| 379 | A1                   | Hippocampus | 0.17 ± 0.01*** | 1.00 ± 0.07 | 1.08 ± 0.10   |
| 380 |                      | Cortex      | 0.13 ± 0.01*** | 1.00 ± 0.06 | 1.12 ± 0.05   |
| 381 |                      |             |                |             |               |
| 382 | GFAP                 | Hippocampus | 0.30 ± 0.02*** | 1.00 ± 0.06 | 1.08 ± 0.13   |
| 383 |                      | Cortex      | 0.12 ± 0.01*** | 1.00 ± 0.04 | 1.15 ± 0.09   |
| 384 |                      |             |                |             |               |
| 385 | Iba-1                | Hippocampus | 0.56 ± 0.01*** | 1.00 ± 0.05 | 1.01 ± 0.10   |
| 386 |                      | Cortex      | 0.56 ± 0.03*** | 1.00 ± 0.06 | 1.05 ± 0.06   |

387  
388 Values are relative gene expression (means ± SEM) of 6-8 mice (APP/PS = 1). Statistical analysis was  
389 conducted using one-way analysis of variance, followed by Bonferroni's post-hoc test or T-test (GraphPad  
390 Prism 6; GraphPad Software, La Jolla, CA, USA). Differences were considered significant when P < 0.05.

391 \*: P < 0.05, \*\*: P < 0.01 vs. APP/PS2 group.  
392 N.T., not tested; A1, B cell leukemia/lymphoma 2 related protein A1a; ADAM10, a disintegrin and  
393 metallopeptidase domain 10; BACE1, beta-site APP cleaving enzyme 1; CatB, cathepsin B; F4/80,  
394 EGF-like module-containing mucin-like hormone receptor-like 1; GFAP, glial fibrillary acidic protein;  
395 Iba-1, allograft inflammatory factor 1; iNOS, inducible nitric oxide synthase.  
396



## 397 **Effect of 5-CQA on A $\beta$ formation**

398 The fluorescence intensity of A $\beta$  alone increased immediately and reached a  
399 plateau after a 60-min incubation. The presence of 5-CQA, the main component of CPP,  
400 did not affect the fluorescence intensity, suggesting that 5-CQA did not inhibit A $\beta$   
401 fibrillization (Fig 6A).

402 The aggregation and/or oligomerization state of A $\beta$  was disaggregated with  
403 increasing 5-CQA dosage, and it was significantly lower ( $P < 0.05$ , Bonferroni's  
404 post-hoc test) in the 5-CQA (10 and 100  $\mu\text{M}$ ) than in the without 5-CQA (Fig 6B).

405

406 **Fig 6. Effect of 5-CQA on A $\beta$  fibril formation in vitro.** The formation of A $\beta_{1-42}$  was  
407 measured using the ThT fluorescence assays. (A) A $\beta_{1-42}$  solution (200  $\mu\text{M}$ ) was  
408 incubated with 5-CQA (100  $\mu\text{M}$ ). The time course of changes in the fluorescence  
409 intensity was measured. Fluorescence intensity is expressed as A $\beta$  fibrillization. (B) The  
410 aggregation and/or oligomerization state of A $\beta_{1-42}$  (25  $\mu\text{M}$ ) was incubated with either  
411 DMSO or 5-CQA (1, 10, 100  $\mu\text{M}$ ) for 7 days before the assay. Fluorescence intensity is  
412 expressed as A $\beta$  disaggregation. Values are the mean  $\pm$  SEM of  $N = 5-8$ . \*:  $P < 0.05$ ,  
413 \*\*:  $P < 0.01$ , vs. without 5-CQA (Bonferroni's post-hoc test).

414

415

## 416 **Discussion**

417 In general, the effectiveness of coffee for health is owing to the abundant  
418 polyphenols in coffee beans typified by CGAs. In this study, we found that chronic  
419 consumption of CPP improved memory and cognitive function and reduced A $\beta$   
420 pathology in APP/PS2 mice. We also demonstrated that the CPP may modulate AD

421 phenotypes by promoting disaggregation of fibril A $\beta$  species into A $\beta$  peptide in the  
422 brain.

423         The CPP-treated mice improved memory and cognitive function because of  
424 three behavioral analyses. The novel object recognition test is based on the spontaneous  
425 tendency of rodents to explore a novel object without requiring reward or penalty. This  
426 test measures visual recognition memory, the spatial and temporal context of object  
427 recognition, which is supported by interactions between the cortex and the hippocampus  
428 [19]. The Morris water maze test investigates spatial learning and memory. This test  
429 involves the hippocampus, cerebral cortex, and striatum [20]. The step-through passive  
430 avoidance test evaluates long-term memory of learned avoidance behavior by electric  
431 foot shock. These behavioral analyses may influence not only cognitive function, but  
432 also motivation or motor function [21]. Improvement in the performance of learning and  
433 memory tasks in CPP-treated mice is unlikely due to the changes in activity, motivation,  
434 or motor function. The total object exploration time in the novel object recognition test,  
435 the swimming speed in the Morris water maze test, and the latency time during  
436 acquisition trial in the step-through passive avoidance test in CPP-treated mice did not  
437 differ from those in CPP-non-treated mice. These results suggest that exploratory  
438 activity and motor function, that is swimming ability, did not change. Therefore, the  
439 improved behavioral performance in CPP-treated mice is probably owing to enhanced  
440 learning and memory. Several studies suggested that hippocampal damage causes  
441 impaired performance in behavioral tests [20, 22, 23]. The CPP-treated mice showed  
442 significantly decreased A $\beta$  plaque in the hippocampus than the CPP-non-treated mice.  
443 These findings suggest that the CPP protected against A $\beta$  toxicity, particularly in the  
444 hippocampus, and improved the three behavioral test performances.

445         In this study, dietary CPP significantly decreased A $\beta$  deposit in the brain of

446 APP/PS2 mice without changing A $\beta$  metabolism-related gene expression. To study the  
447 underlying mechanism for the reduction of A $\beta$  deposit by dietary CPP, we investigated  
448 the effects of CPP components on the aggregation and disaggregation of A $\beta$ -protein.

449 CGAs possess inhibitory effect on A $\beta$ -protein aggregation [14]. Therefore, the  
450 influence of 5-CQA, a major component of CPP, on A $\beta$  fibrils was investigated using  
451 the ThT assay, and A $\beta$  fibrils were disaggregated, which did not affect A $\beta$  fibril  
452 formation. Ono et al. reported that grape seed-derived polyphenols with phenolic groups  
453 like CGA disaggregate A $\beta$  fibrils and reduce the cytotoxicity of A $\beta$  fibrils [24]. Wei et al.  
454 reported that CGA has a neuroprotective effect on the cytotoxicity of A $\beta$  [15]. These  
455 studies suggest that CGA may disaggregate A $\beta$  fibrils and could possibly reduce  
456 cytotoxicity. Conventionally, A $\beta$  fibrils that accumulate as cerebral amyloid are thought  
457 to exert neurotoxicity. However, in recent years, oligomers, the intermediate stages of  
458 amyloid  $\beta$  protein aggregation, have been reported to be the most toxic, and oligomer  
459 reduction may be effective for treating AD [25]. Therefore, investigating the influence  
460 of CGA on the structure of amyloid  $\beta$  protein and the formation and degradation of  
461 oligomers in the future is necessary.

462 A $\beta$  deposition is observed in APP/PS2 mice from 2 to 3 months of age and it  
463 increases with age; cognitive function decreases after 4–5 months of age [17, 18].  
464 Fontata and colleagues reported that synaptic excitability of the hippocampus changes  
465 from 3 months of age in APP/PS2 mice [26]. In addition, the increase in A $\beta$  deposition  
466 in humans begins 15–20 years before AD onset [6]. Protecting the brain from disorders  
467 caused by A $\beta$  and preventing the onset of AD through early intervention are important.  
468 The cognitive dysfunction is not improved when it develops in AD only by removal of  
469 A $\beta$  in the brain [27]. In this study, CGA was ingested by 5-week-old mice before the  
470 changes in A $\beta$  deposition, cognitive function, and synaptic function occurred, and the

471 preventive effect of CGA on AD onset was clarified. Therefore, in this study, we could  
472 demonstrate the effect of CGA. Further studies on the analysis of the detailed  
473 mechanism of CGA on brain functions, and its effectiveness on A $\beta$  deposition, which  
474 has already occurred as well as cognitive decline, are necessary. CGA does not only  
475 have an effect in reducing A $\beta$  deposition, but also has inhibitory actions on antioxidant  
476 and AChE activities [16]. Thus, these findings suggest that CGA has various effects to  
477 improve cognitive dysfunction and also therapeutic effect in AD.

478

## 479 **Conclusion**

480 We demonstrated that CPP treatment significantly attenuated recognition  
481 memory, spatial learning and memory, and long-term memory activity decline, as well  
482 as alleviated A $\beta$  plaque deposition. Consequently, CPP provided a protective effect  
483 against AD progression through A $\beta$ . These findings may shed light on CPP as an  
484 effective therapeutic and prophylactic agent for cognitive deficits by AD.

485

486

## 487 **Acknowledgments**

488 We thank Tatsuya Kusaura and Yukiteru Sugiyama for preparing the CPP. We  
489 thank Yukie Kawatani for technical assistance.

490

491

## 492 **Author Contributions**

493 **Conceptualization:** KI KM AS NO.

494 **Formal analysis:** KI MY.

495 **Investigation:** KI MY.

496 **Methodology:** KI MY KM.

497 **Project administration:** NO.

498 **Supervision:** KM AS NO.

499 **Visualization:** KI MY.

500 **Writing-original draft:** KI.

501 **Writing-review & editing:** KM AS.

502

## 503 **References**

- 504 1. Mucke L, Selkoe DJ. Neurotoxicity of amyloid  $\beta$ -protein: synaptic and  
505 network dysfunction. *Cold Spring Harb Perspect Med.* 2012;2: a006338.
- 506 2. Braak H, Braak E. Frequency of stages of Alzheimer-related lesions in  
507 different age categories. *Neurobiol Aging.* 1997;18: 351-357.
- 508 3. De Strooper B, Vassar R, Golde T. The secretases: enzymes with  
509 therapeutic potential in Alzheimer disease. *Nat Rev Neurol.* 2010;6:  
510 99-107.
- 511 4. Nathalie P, Jean-Noël O. Processing of amyloid precursor protein and  
512 amyloid peptide neurotoxicity. *Curr Alzheimer Res.* 2008;5: 92-99.
- 513 5. Younkin SG. The role of A $\beta$ 42 in Alzheimer's disease. *J Physiol Paris.*  
514 1998;92: 289-292.
- 515 6. Bateman RJ, Xiong C, Benzinger TL, Fagan AM, Goate A, Fox NC, et al.  
516 Clinical and biomarker changes in dominantly inherited Alzheimer's  
517 disease. *N Engl J Med.* 2012;367: 795-804
- 518 7. Huang Y, Mucke L. Alzheimer mechanisms and therapeutic strategies. *Cell.*  
519 2012;148: 1204-1222.
- 520 8. Suárez-Calvet M, Araque Caballero MÁ, Kleinberger G, Bateman RJ,  
521 Fagan AM, Morris JC, et al. Early changes in CSF sTREM2 in dominantly  
522 inherited Alzheimer's disease occur after amyloid deposition and neuronal  
523 injury. *Sci Transl Med.* 2016;8: 369ra178.
- 524 9. Arts IC, Hollman PC. Polyphenols and disease risk in epidemiologic  
525 studies. *Am J Clin Nutr.* 2005;81:317S-325S.
- 526 10. Panza F, Solfrizzi V, Barulli MR, Bonfiglio C, Guerra V, Osella A, et al.  
527 Coffee, tea, and caffeine consumption and prevention of late-life cognitive

- 528 decline and dementia: a systematic review. *J Nutr Health Aging*. 2015;19:  
529 313-328.
- 530 11. Solfrizzi V, Panza F, Imbimbo BP, D'Introno A, Galluzzo L, Gandin C, et  
531 al. Coffee consumption habits and the risk of mild cognitive impairment:  
532 the Italian longitudinal study on aging. *J Alzheimers Dis*. 2015;47:  
533 889-899.
- 534 12. Clifford MN. Chlorogenic acids and other cinnamates—nature, occurrence  
535 and dietary burden. *J Sci Food Agric*. 1999;79: 362-372.
- 536 13. Ito H, Sun XL, Watanabe M, Okamoto M, Hatano T. Chlorogenic acid and  
537 its metabolite m-coumaric acid evoke neurite outgrowth in hippocampal  
538 neuronal cells. *Biosci Biotechnol Biochem*. 2008;72: 885-888.
- 539 14. Miyamae Y, Kurisu M, Murakami K, Han J, Isoda H, Irie K, et al.  
540 Protective effects of caffeoylquinic acids on the aggregation and  
541 neurotoxicity of the 42-residue amyloid  $\beta$ -protein. *Bioorg Med Chem*.  
542 2012;20: 5844-5849.
- 543 15. Wei M, Chen L, Liu J, Zhao J, Liu W, Feng F. Protective effects of a  
544 Chitosan fraction and its active components on  $\beta$ -amyloid-induced  
545 neurotoxicity. *Neurosci Lett*. 2016;617: 143-149.
- 546 16. Kwon SH, Lee HK, Kim JA, Hong SI, Kim HC, Jo TH, et al.  
547 Neuroprotective effects of chlorogenic acid on scopolamine-induced  
548 amnesia via anti-acetylcholinesterase and anti-oxidant activities in mice.  
549 *Eur J Pharmacol*. 2010;649: 210-217.
- 550 17. Richards JG, Higgins GA, Ouagazzal AM, Ozmen L, Kew JN, Bohrmann  
551 B, et al. PS2APP transgenic mice, coexpressing hPS2mut and hAPPswe,  
552 show age-related cognitive deficits associated with discrete brain amyloid

- 553 deposition and inflammation. *J Neurosci.* 2003;23: 8989-9003.
- 554 18. Toda T, Noda Y, Ito G, Maeda M, Shimizu T. Presenilin-2 mutation causes  
555 early amyloid accumulation and memory impairment in a transgenic  
556 mouse model of Alzheimer's disease. *J Biomed Biotechnol.* 2011;2011:  
557 617974.
- 558 19. Grayson B, Leger M, Piercy C, Adamson L, Harte M, Neill JC.  
559 Assessment of disease-related cognitive impairments using the novel  
560 object recognition (NOR) task in rodents. *Behav Brain Res.* 2015;285:  
561 176-193.
- 562 20. D'Hooge R, De Deyn PP. Applications of the Morris water maze in the  
563 study of learning memory. *Brain Res Rev.* 2001;36: 60-90.
- 564 21. Webster SJ, Bachstetter AD, Van Eldik LJ. Comprehensive behavioral  
565 characterization of an APP/PS-1 double knock-in mouse model of  
566 Alzheimer's disease. *Alzheimers Res Ther.* 2013;5: 28.
- 567 22. Mumby DG. Perspective on object-recognition memory following  
568 hippocampal damage: lessons from studies in rats. *Behav Brain Res.*  
569 2001;127: 159-181.
- 570 23. Shamsaei N, Khaksari M, Erfani S, Rajabi H, Aboutaleb N. Exercise  
571 preconditioning exhibits neuroprotective effects on hippocampal CA1  
572 neuronal damage after cerebral ischemia. *Neural Regen Res.* 2015;10:  
573 1245-1250.
- 574 24. Ono K, Condrón MM, Ho L, Wang J, Zhao W, Pasinetti GM, et al. Effects  
575 of grape seed-derived polyphenols on amyloid beta-protein self-assembly  
576 and cytotoxicity. *J Bio Chem.* 2008;283: 32176-32187.
- 577 25. Ono K, Condrón MM, Teplow DB. Structure-neurotoxicity relationships of



578 amyloid beta-protein oligomers. Proc Natl Acad Sci USA. 2009;106:  
579 14745-14750.

580 26. Fontana R, Agostini M, Murana E, Mahmud M, Scremin E, Rubega M, et  
581 al. Early hippocampal hyperexcitability in PS2APP mice: role of mutant  
582 PS2 and APP. Neurobiol Aging. 2017;50: 64-76.

583 27. Salloway S, Sperling R, Fox NC, Blennow K, Klunk W, Raskind M, et al.  
584 Two phase 3 trials of bapineuzumab in mild-moderate Alzheimer's disease.  
585 N Engl J Med. 2014;370: 322-333.

586

587

## 588 **Supporting information**

589 **S1 Table. Taqman probes.**

590

591 **Fig.1**

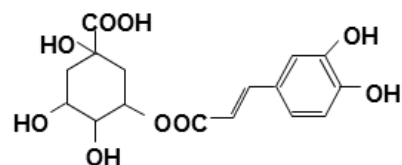

5-caffeoyl quinic acid (5-CQA)

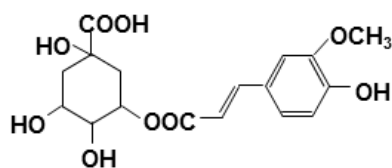

5-feruloyl quinic acid (5-FQA)

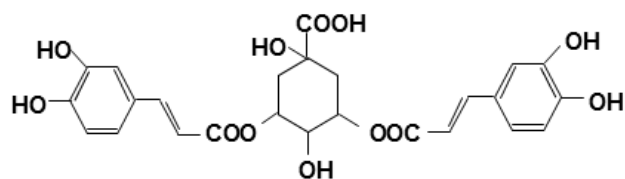

3,5-di-caffeoyl quinic acid (3,5-diCQA)

592

593

594 **Fig.2**

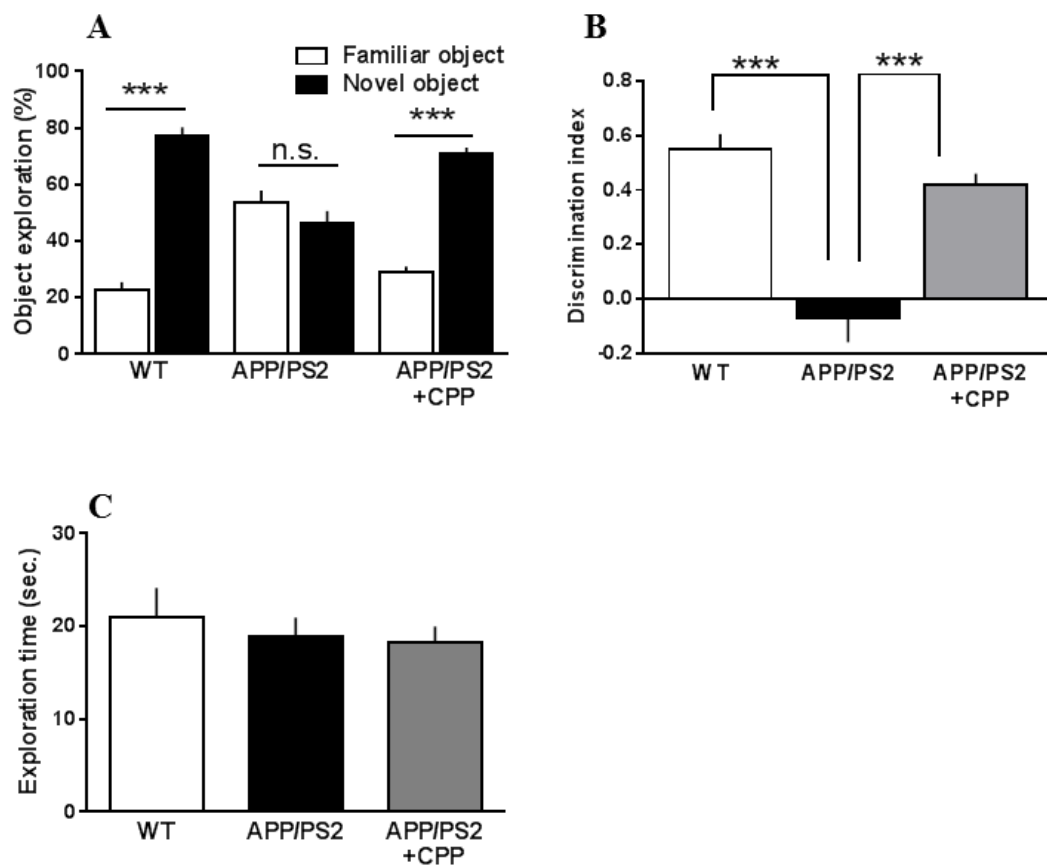

595

596

597

598 **Fig.3**

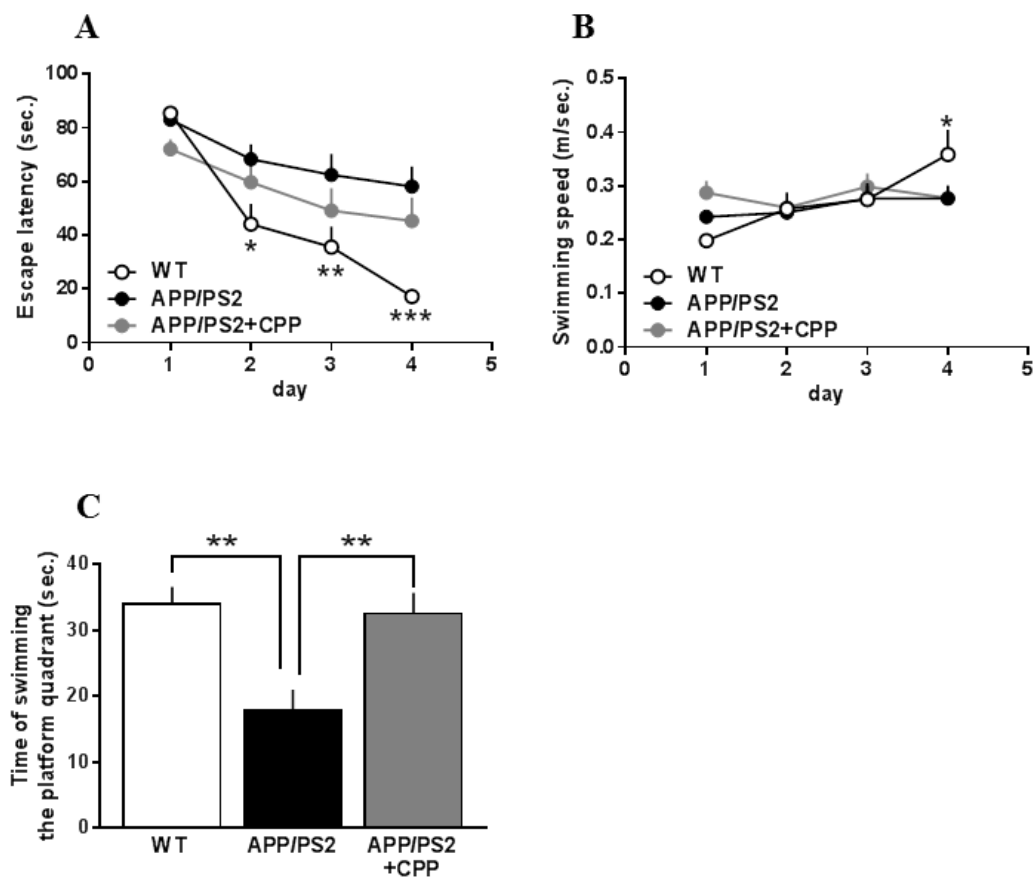

599

600

601

602 **Fig.4**

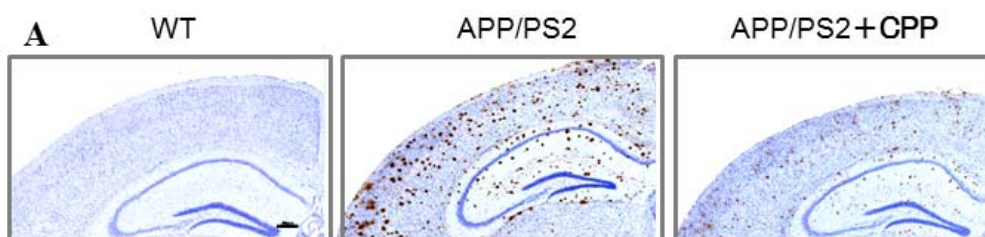

**B**

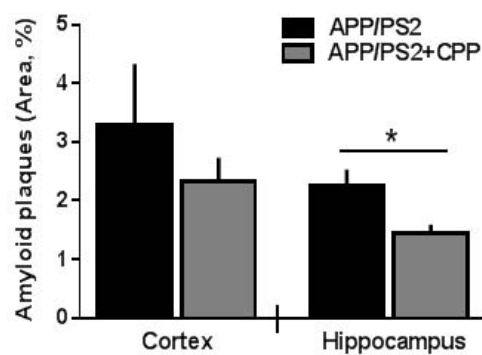

603

604

605

606 **Fig.6**

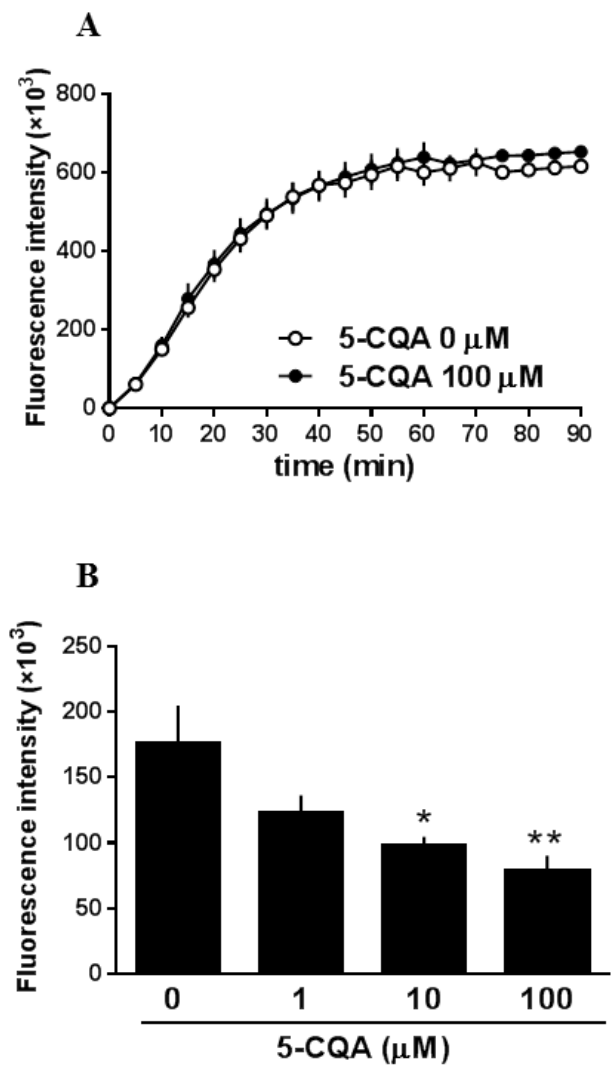

607
